# Supplementary material for: Do Genetic Drift and Gene Flow Affect the Geographic Distribution of Female Plants in Gynodioecious Lobelia siphilitica?
Source: Plants (Basel). 2022 Mar 20;11(6):825. doi: 10.3390/plants11060825 (PMC8950786; doi:10.3390/plants11060825)
Supplement: Supplementary file 1 [file plants-11-00825-s001.zip › Figure S1.pdf]

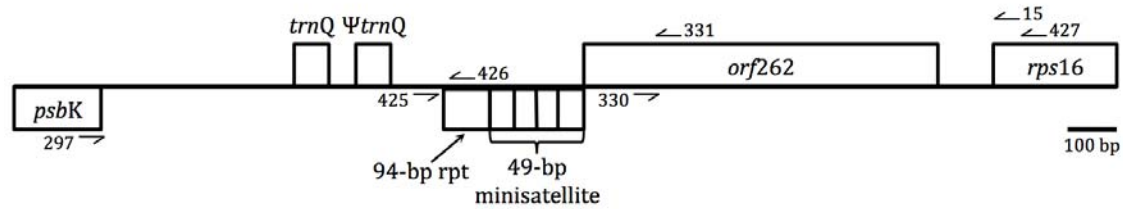

Figure S1. Diagram of the *psbK*–*rps16* region of the plastid genome in *Lobelia siphilitica*, highlighting the relative positions and orientations of all genes (*psbK*, *rps16*, and two distinct copies of *trnQ*), a 94-bp repeat, an imperfect minisatellite, and unknown open reading frame (*orf262*). Primer sequences are listed in Table S4. Drawing is to scale.
