# Supplementary material for: Do Genetic Drift and Gene Flow Affect the Geographic Distribution of Female Plants in Gynodioecious Lobelia siphilitica?
Source: Plants (Basel). 2022 Mar 20;11(6):825. doi: 10.3390/plants11060825 (PMC8950786; doi:10.3390/plants11060825)
Supplement: Supplementary file 1 [file plants-11-00825-s001.zip › Figure S3.pdf]

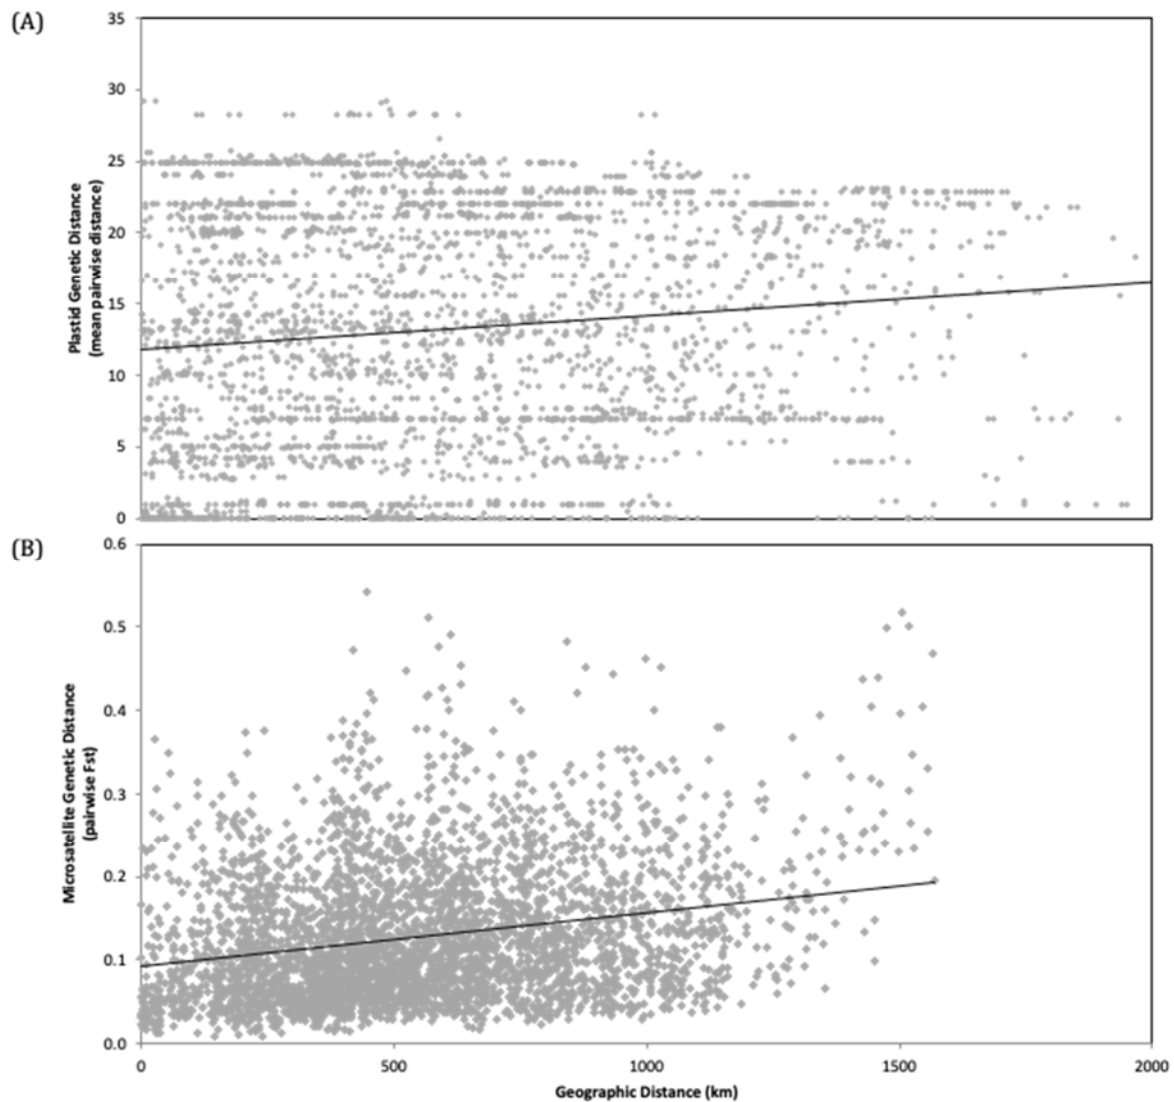

Figure S3. Correlation between geographic and genetic distances in *Lobelia siphilitica* based on (A) mean pairwise differences using 13 plastid haplogroups (Mantel correlation,  $r = 0.112$ ,  $df = 81$ ,  $P = 0.01$ ) and (B) pairwise  $F_{ST}$  using nuclear microsatellite data (Mantel correlation,  $r = 0.246$ ,  $df = 88$ ,  $P = 0.01$ ).
