# Supplementary material for: Do Genetic Drift and Gene Flow Affect the Geographic Distribution of Female Plants in Gynodioecious Lobelia siphilitica?
Source: Plants (Basel). 2022 Mar 20;11(6):825. doi: 10.3390/plants11060825 (PMC8950786; doi:10.3390/plants11060825)
Supplement: Supplementary file 1 [file plants-11-00825-s001.zip › Table S1.xlsx]

## Sheet: Table S1
Appiah-Madson et al.—Plants 2022—Table S1
Table S1. Demographic and plastid haplogroup information for 92 populations of Lobelia siphilitica. Sex ratio is reported as the proportion female. When populations were sampled in both 2009 and 2011, averaged sex ratio and population size is listed. Populations are divided by whether they were considered central or peripheral. Haplogroup diversity (h) and number of individuals haplotyped is repo…
State	Pop	Pop size	Sex ratio	Latitude	Longitude	Location	Year(s) sampled	Herbarium Specimen(s)	C1	C5	C6	C7	C8	C12	C13	C13b	C16	C17	C19	C22	C23	h	N
IA	CDI	69	0.2319	41.689	-93.7201	periphery	2009	KE 0049658	0	0	0.6	0	0	0.2	0	0	0.2	0	0	0	0	0.7	5
IA	CERA	249	0.0442	41.6829	-92.8708	periphery	2009	KE 0049680	0	0	0	0.75	0	0.25	0	0	0	0	0	0	0	0.5	4
IA	FW	360	0.2639	41.5704	-92.5684	periphery	2009	KE 0049659	0	0	0	1	0	0	0	0	0	0	0	0	0	0	4
IA	KR	309	0.0939	41.7052	-92.7863	periphery	2009	KE 0049657	0	0	0	1	0	0	0	0	0	0	0	0	0	0	4
IA	RT	108	0.0648	41.7052	-92.8643	periphery	2009	KE 0049660	0	0	0	1	0	0	0	0	0	0	0	0	0	0	4
IL	BC	15	1	37.311	-88.5314	center	2011	KE 0049633	0	0	0	0	0	1	0	0	0	0	0	0	0	0	4
IL	COL	16	0.7692	39.4123	-88.0888	center	2011	KE 0049654	0	0	0	1	0	0	0	0	0	0	0	0	0	0	4
IL	CR	33	0.6875	39.4242	-88.0998	center	2011	KE 0049655	0	0.166667	0	0.333333	0	0.5	0	0	0	0	0	0	0	0.733333	6
IL	CRS	80	0.0125	39.2263	-89.7992	center	2011	.	0	0	0	0	0	1	0	0	0	0	0	0	0	0	4
IL	FC	11	0.5455	37.3761	-89.0829	center	2011	.	0	0	0	0	0	0	0	1	0	0	0	0	0	0	2
IL	HH	1190	0.3363	41.2135	-89.3216	center	2009	KE 0049653	0	0	0	0	0	1	0	0	0	0	0	0	0	0	5
IL	ILCR	40	0.6875	40.3137	-91.0428	center	2009	.	0	0	0	0.833333	0	0	0	0	0	0	0.166667	0	0	0.333333	6
IL	JPH	15	0.8667	37.6287	-89.343	center	2011	KE 0049656	0	0	1	0	0	0	0	0	0	0	0	0	0	0	4
IL	LK	22	0.1905	37.8763	-89.5469	center	2011	KE 0049645	0	0	0	0	0	1	0	0	0	0	0	0	0	0	4
IL	LP	2	0	39.428	-88.4271	center	2011	.	0	0	0	0	0	1	0	0	0	0	0	0	0	0	2
IL	RTW	70	0.1304	42.1907	-88.0137	center	2009	KE 0049651	0	0	0	1	0	0	0	0	0	0	0	0	0	0	4
IL	SRP	15	0.1333	42.4978	-89.2529	center	2009	KE 0049652	0	0	0	0	0	0.833333	0.166667	0	0	0	0	0	0	0.333333	6
IL	WIH	14	0	37.5334	-89.119	center	2011	KE 0049634	0	0	1	0	0	0	0	0	0	0	0	0	0	0	4
IN	BCW	50	0.26	38.205	-86.4009	center	2011	KE 0049646	0	0	0	0	0	0	0	0	0	0	1	0	0	0	5
IN	CRS	20	0.5556	39.0888	-85.6713	center	2011	KE 0049648	0	0	0	0	0	1	0	0	0	0	0	0	0	0	4
IN	FRD	611	0.4814	39.1382	-86.3986	center	2009	KE 0049665	0	0	0.2	0	0	0.4	0	0	0	0	0.4	0	0	0.8	5
IN	GT	27	0	40.7261	-86.502	center	2009	KE 0049666	0	0	0	1	0	0	0	0	0	0	0	0	0	0	4
IN	MR	557	0.5	40.7906	-85.2074	center	2009	KE 0049647, KE 0049661	0	0	0	1	0	0	0	0	0	0	0	0	0	0	4
IN	NH	58	0.566	38.1008	-87.9541	center	2011	KE 0049668	0	0	0	0.666667	0	0.333333	0	0	0	0	0	0	0	0.533333	6
IN	SC	38	0.653	39.0921	-85.684	center	2009, 2011	KE 0049664	0	0	0	0	0	1	0	0	0	0	0	0	0	0	8
IN	STW	5	1	39.1286	-86.3848	center	2009, 2011	photo voucher	0	0	0	1	0	0	0	0	0	0	0	0	0	0	7
IN	TH	76	0.4345	39.4338	-87.3244	center	2009, 2011	KE 0049662	0	0	0	1	0	0	0	0	0	0	0	0	0	0	8
IN	WC	47	0.5238	39.0873	-85.6542	center	2009, 2011	KE 0049663	0	0	0	0	0	1	0	0	0	0	0	0	0	0	8
IN	WN	6	0.6667	40.8893	-85.0029	center	2009	photo voucher	0	0.5	0	0	0	0	0	0	0	0	0.5	0	0	0.666667	4
IN	YW	1052	0.6664	39.2191	-86.3425	center	2009, 2011	KE 0049649, KE 0049650	0	0	0.304348	0.173913	0	0.26087	0	0	0	0	0.26087	0	0	0.774704	23
KY	ANG	30	0	37.493	-84.2268	center	2009	KE 0049675	0	0.857143	0.142857	0	0	0	0	0	0	0	0	0	0	0.263736	14
KY	CAC	5	0.25	38.894	-84.3731	center	2009, 2011	KE 0049678	0	0	0	0.666667	0	0	0	0	0	0	0.166667	0	0.166667	0.6	6
KY	GLA	56	0.1786	37.0384	-85.9191	center	2009	KE 0049677	0	0	0	0	0	0	0	0	0	0	1	0	0	0	13
KY	KY	10	0.9	37.4526	-84.3052	center	2009	KE 0049676	0	0.888889	0	0.111111	0	0	0	0	0	0	0	0	0	0.222222	9
KY	LIB	53	0.1887	37.3852	-84.9191	center	2009	KE 0049671	.	.	.	.	.	.	.	.	.	.	.	.	.	.	.
KY	LIBII	10	0.1111	37.4032	-84.8939	center	2009	KE 0049672	.	.	.	.	.	.	.	.	.	.	.	.	.	.	.
KY	RAN	11	0.6364	37.5718	-84.6172	center	2009	photo voucher	0	1	0	0	0	0	0	0	0	0	0	0	0	0	5
KY	SFL	99	0.5102	37.393	-84.6711	center	2009	KE 0049673	0	0.666667	0.333333	0	0	0	0	0	0	0	0	0	0	0.533333	6
KY	SYL	2	0	37.4609	-84.6008	center	2009	photo voucher	.	.	.	.	.	.	.	.	.	.	.	.	.	.	.
KY	TIL	72.5	0.6553	37.8744	-87.5066	center	2009, 2011	KE 0049670	0	0	0	1	0	0	0	0	0	0	0	0	0	0	6
KY	TWL	10	0.6	38.0852	-85.7699	center	2011	photo voucher	0	0	0	0	0	0	0	0	0	0	1	0	0	0	4
MA	BC	552	0.033	42.0575	-73.3508	periphery	2003	.	0	0	0	0	0	0	0	0	0	0	1	0	0	0	13
MI	MS	18	0	42.7695	-85.3653	periphery	2009	KE 0049669	0	0.8	0.2	0	0	0	0	0	0	0	0	0	0	0.4	5
MI	OS	26	0	42.601	-85.3905	periphery	2009	KE 0049692	0	0	0	0	0	0	0	0	0	0	1	0	0	0	4
MN	BT	21	0.1905	44.727	-94.3964	periphery	2009	KE 0049688	0.4	0	0	0.6	0	0	0	0	0	0	0	0	0	0.6	5
MN	CCFC	2000	0	45.3974	-93.1581	periphery	2009	KE 0049691	0	0	0	1	0	0	0	0	0	0	0	0	0	0	4
MN	SF	125	0	44.7717	-93.3727	periphery	2009	KE 0049689	0	0.0769231	0.846154	0.0769231	0	0	0	0	0	0	0	0	0	0.294872	13
MN	TKF	400	0	44.0615	-95.2967	periphery	2009	KE 0049690	0	0	0	0	0	0	0	0	0	0	1	0	0	0	4
MO	ELS	65.5	0.0273	39.1323	-90.7656	center	2009, 2011	KE 0049681	0	0	0	0.555556	0	0.388889	0.0555556	0	0	0	0	0	0	0.568627	18
MO	ELSII	210	0.0593	39.0966	-90.7499	center	2009	KE 0049684	0	0	0	0	0	1	0	0	0	0	0	0	0	0	5
MO	LIT	974	0.1156	37.803	-89.8965	center	2009	KE 0049685	0	0	0	0	0	1	0	0	0	0	0	0	0	0	15
MO	MAM	80.5	0.1288	38.1248	-90.6698	periphery	2009, 2011	KE 0049683, KE 0049682	0	0.125	0.25	0.5	0	0.125	0	0	0	0	0	0	0	0.75	8
MO	NL	8	0	39.6143	-91.3978	center	2009	photo voucher	0	0.142857	0.285714	0.428571	0	0.142857	0	0	0	0	0	0	0	0.809524	7
OH	ACR	27	0	40.6782	-81.843	periphery	2009	photo voucher	.	.	.	.	.	.	.	.	.	.	.	.	.	.	.
OH	BAC	30	0.1333	41.1821	-81.6429	periphery	2009	KE 0049725	0	0	0	0	0	0	0	0	0	0	1	0	0	0	6
OH	BFW	13	0	41.1101	-81.3395	periphery	2009	photo voucher	.	.	.	.	.	.	.	.	.	.	.	.	.	.	.
OH	BIB	17	0	41.1797	-81.6406	periphery	2009	KE 0049725	0	0	0	0	0	0	0	0	0	0	1	0	0	0	4
OH	BIH	23	0	41.1792	-81.6355	periphery	2009	KE 0049725	.	.	.	.	.	.	.	.	.	.	.	.	.	.	.
OH	BLS	78	0.0385	41.1817	-81.6531	periphery	2009	KE 0049725	0	0	0	0	0	0	0	0	0	0	1	0	0	0	4
OH	BVI	18	0.5	41.4481	-83.7907	center	2009	photo voucher	0	0	0	0.4	0	0	0	0	0	0	0.6	0	0	0.6	5
OH	BVII	17	0.1176	41.4494	-83.788	center	2009	photo voucher	0	0	0	0	0	1	0	0	0	0	0	0	0	0	4
OH	BWB	153	0.0131	41.1852	-81.6469	periphery	2009	KE 0049725	0	0	0	0	0	0	0	0	0	0	1	0	0	0	4
OH	CP	419	0	41.5359	-83.8395	center	2009	KE 0049815	0	0	0	1	0	0	0	0	0	0	0	0	0	0	4
OH	DS	25.5	0	41.1414	-81.3224	periphery	2009, 2011	photo voucher	0	0	0	0	0	0	0	0	0	0	1	0	0	0	12
OH	HR	224	0.6315	39.5085	-84.7162	center	2009, 2011	KE 0049789, KE 0049798	0	0	1	0	0	0	0	0	0	0	0	0	0	0	23
OH	HST	350	0.0745	40.4989	-81.9569	periphery	2009	photo voucher	.	.	.	.	.	.	.	.	.	.	.	.	.	.	.
OH	JWS	108	0	41.1726	-81.2027	periphery	2009	KE 0049829	.	.	.	.	.	.	.	.	.	.	.	.	.	.	.
OH	KYR	144	0.1938	40.6071	-81.5992	periphery	2009	KE 0049717	0	0	0	0	0	0	0	0	0	0	1	0	0	0	4
OH	MB	63.5	0.0438	41.1719	-81.2018	periphery	2009, 2011	KE 0049830	0	0	0	0	0	0	0	0	0	0	1	0	0	0	46
OH	PS	170	0.5119	41.6438	-83.436	center	2009	photo voucher	0	0	0	1	0	0	0	0	0	0	0	0	0	0	4
OH	STS	192	0.0053	40.4867	-81.9784	periphery	2009	KE 0049803	0	0.666667	0	0	0	0	0	0	0	0	0.333333	0	0	0.533333	6
OH	WBC	1718	0.0063	41.5563	-83.8525	center	2009	KE 0049816	0	0	0	1	0	0	0	0	0	0	0	0	0	0	4
ON	CL	57	0.0351	43.4657	-79.9476	periphery	2009	KE 0049712	0	1	0	0	0	0	0	0	0	0	0	0	0	0	4
ON	LI	424	0.1108	43.2191	-80	periphery	2009	.	.	.	.	.	.	.	.	.	.	.	.	.	.	.	.
ON	MRA	336	0.3571	43.2267	-80.0075	periphery	2009	KE 0049710	0	0.846154	0	0	0	0	0	0	0	0	0.153846	0	0	0.282051	13
ON	TJP	400	0.0125	43.3702	-80.9972	periphery	2009	KE 0049711	0	0.5	0	0	0	0	0	0	0	0	0.5	0	0	0.6	6
ON	WL	.	0.0116	42.5841	-81.6428	periphery	2009	KE 0049713	0	0.2	0	0	0	0	0	0	0	0	0.8	0	0	0.4	5
ON	WR	80	0.025	43.5466	-80.1806	periphery	2009	KE 0049714	0	1	0	0	0	0	0	0	0	0	0	0	0	0	4
VA	CHE	29	0.04	37.2091	-79.564	periphery	2011	KE 0049700	0	0	0	0	0	0	0	0	0	0	0	0.166667	0.833333	0.333333	6
VA	CRE	11	0.1	38.8732	-77.719	periphery	2011	KE 0049696	0	0	0	0	0	0	0	0	0	0	0	0	1	0	4
VA	ENO	9	0	38.8256	-77.8228	periphery	2011	KE 0049697	0	0	0	0	0	0	0	0	0	0	0	0	1	0	4
VA	FIN	4	0	37.6703	-78.7998	periphery	2011	photo voucher	0	0	0	0	0	0	0	0	0	0	0	0	1	0	4
VA	FINII	39	0	37.6478	-78.7887	periphery	2011	KE 0049698	0	0	0	0	0	0	0	0	0	0	0	0	1	0	3
VA	MOO	3	0	38.5721	-78.2699	periphery	2011	photo voucher	0	0	0	0	0	0	0	0	0	0	0	0	1	0	3
VA	PVR	37	0	37.5502	-79.564	periphery	2011	KE 0049699	0	0	0	0	0	0	0	0	0	0	0	0	1	0	4
WI	PVC	184	0.0489	43.1054	-89.8093	periphery	2009	KE 0049715	0	0	0	0.666667	0	0.333333	0	0	0	0	0	0	0	0.47619	15
WV	BB	6	0	37.9209	-80.266	periphery	2009, 2011	photo voucher	0	0	0	0.111111	0	0	0	0	0	0	0.333333	0	0.555556	0.638889	9
WV	BUC	245	0.0607	39.5305	-79.6364	periphery	2009	KE 0049705	0	0	0	0	0.2	0	0	0	0	0	0.6	0	0.2	0.7	5
WV	EDR	163	0.019	38.3109	-80.0938	periphery	2009	KE 0049694, KE 0049693	0	0	0	0	0	0	0	0	0	0	0	0	1	0	13
WV	GRA	696	0.0578	39.271	-80.0395	periphery	2009	KE 0049716	0	0	0	0	0	0	0	0	0	0.4	0.6	0	0	0.6	5
WV	SD	19.5	0	38.1435	-81.1572	periphery	2009, 2011	KE 0049695	0	0	0	0	0	0	0	0	0	0	0	0	1	0	11
WV	SRR	3	0	39.1249	-79.9864	periphery	2009	photo voucher	0	0	0	0	1	0	0	0	0	0	0	0	0	0	3
