# Supplementary material for: Do Genetic Drift and Gene Flow Affect the Geographic Distribution of Female Plants in Gynodioecious Lobelia siphilitica?
Source: Plants (Basel). 2022 Mar 20;11(6):825. doi: 10.3390/plants11060825 (PMC8950786; doi:10.3390/plants11060825)
Supplement: Supplementary file 1 [file plants-11-00825-s001.zip › Table S2.pdf]

Table S2. List of alleles found in 90 populations of *Lobelia siphilitica* at nuclear microsatellite loci *Lob6*, *Lob9*, and *Lobtri1*.

| <i>Lob6</i>            | <i>Lob9</i>            | <i>Lobtri1</i>        |
|------------------------|------------------------|-----------------------|
| (GTAT) <sub>2-13</sub> | (CATA) <sub>1-17</sub> | (CAA) <sub>2-24</sub> |
| 5                      | 214                    | 310                   |
| 99                     | 218                    | 313                   |
| 103                    | 222                    | 316                   |
| 107                    | 226                    | 319                   |
| 111                    | 230                    | 322                   |
| 115                    | 234                    | 325                   |
| 119                    | 238                    | 328                   |
| 123                    | 242                    | 331                   |
| 127                    | 246                    | 334                   |
| 131                    | 250                    | 337                   |
| 135                    | 254                    | 340                   |
| 139                    | 258                    | 343                   |
|                        | 262                    | 346                   |
|                        | 266                    | 349                   |
|                        | 270                    | 352                   |
|                        | 274                    | 355                   |
|                        | 278                    | 358                   |
|                        |                        | 361                   |
|                        |                        | 364                   |

370

376

---
