# Supplementary material for: Do Genetic Drift and Gene Flow Affect the Geographic Distribution of Female Plants in Gynodioecious Lobelia siphilitica?
Source: Plants (Basel). 2022 Mar 20;11(6):825. doi: 10.3390/plants11060825 (PMC8950786; doi:10.3390/plants11060825)
Supplement: Supplementary file 1 [file plants-11-00825-s001.zip › Table S3.pdf]

Table S3. Descriptive statistics of genetic variability using nuclear microsatellite data for 90 populations of *Lobelia siphilitica*. Average and standard error of the number of samples run for each population ( $N$ ), the number of alleles ( $N_a$ ), the number of effective alleles ( $N_e$ ), Shannon's information index ( $I$ ), observed heterozygosity ( $H_o$ ), expected heterozygosity ( $H_e$ ), unbiased expected heterozygosity ( $UH_e$ ), and the fixation index ( $F$ ), as well as  $F$ -statistics ( $F_{IS}$ ,  $F_{IT}$ ,  $F_{ST}$ ) and the estimated migration rate ( $N_e m$ ) based on three nuclear microsatellite loci as calculated using GenAlEx. Missing data rates for *Lob6*, *Lob9*, and *Lobtri1* were 1.4%, 1.1%, and 2.0%, respectively.

| Loci           | $N$    | $N_a$ | $N_e$ | $I$   | $H_o$ | $H_e$ | $UH_e$ | $F$   | $F_{IS}$ | $F_{IT}$ | $F_{ST}$ | $N_e m$ |
|----------------|--------|-------|-------|-------|-------|-------|--------|-------|----------|----------|----------|---------|
| <i>Lob6</i>    | 18.689 | 4.200 | 2.600 | 1.048 | 0.553 | 0.562 | 0.588  | 0.004 | 0.015    | 0.212    | 0.199    | 1.008   |
| <i>Lob9</i>    | 18.756 | 4.644 | 2.766 | 1.120 | 0.552 | 0.582 | 0.605  | 0.042 | 0.051    | 0.274    | 0.235    | 0.813   |
| <i>Lobtri1</i> | 18.567 | 5.811 | 3.513 | 1.354 | 0.604 | 0.665 | 0.695  | 0.067 | 0.091    | 0.301    | 0.231    | 0.832   |
| Mean           | 18.670 | 4.885 | 2.960 | 1.174 | 0.570 | 0.603 | 0.629  | 0.037 | 0.053    | 0.262    | 0.222    | 0.884   |
| SE             | 0.716  | 0.123 | 0.070 | 0.025 | 0.013 | 0.010 | 0.011  | 0.018 | 0.022    | 0.027    | 0.011    | 0.062   |
