# Supplementary material for: Do Genetic Drift and Gene Flow Affect the Geographic Distribution of Female Plants in Gynodioecious Lobelia siphilitica?
Source: Plants (Basel). 2022 Mar 20;11(6):825. doi: 10.3390/plants11060825 (PMC8950786; doi:10.3390/plants11060825)
Supplement: Supplementary file 1 [file plants-11-00825-s001.zip › Table S4.pdf]

Table S4. List of primers used for PCR amplification for both plastid sequencing and nuclear microsatellite genotyping in *Lobelia siphilitica*.

| Number                           | Primer name                 | Sequence (5' to 3')        | Aligned fragment length (bp) |
|----------------------------------|-----------------------------|----------------------------|------------------------------|
| <i>Plastid sequencing</i>        |                             |                            |                              |
| 426                              | LsA012641F(426)B2           | CAAATAAGAGTATATGCACGAATAGC | 426 + 297: 872–1014          |
| 297                              | Lt013173R(297) <i>psbK</i>  | AAAAAAGCATAGGCCTCGGG       |                              |
| 427                              | Lt011571F(427) <i>rps16</i> | GCAACGATTYGATAAGCCGC       | 427 + 425: 1299–1825         |
| 425                              | LsA012737R(425)B2           | GGGTTTTTGAAGTTCCATCGG      |                              |
| 330                              | LsA012115R(330)B2           | GGTACGGGCTATTGCCGCTGG      | 427 + 330: 643–682           |
| 331                              | LsA011964F(331)B2           | CCGTTCCGGTGTTGCCCTACC      | 425 + 331: 573–1099          |
| 15                               | Interseqfor10(15)           | AGTCATTGGTTCAGTCGGTA       | 425 + 15: 1178–1704          |
| <i>Microsatellite genotyping</i> |                             |                            |                              |
| <i>Lob6F</i>                     | <i>Lob640L</i>              | TTTGCCATCAGGATATTCAAAG     | 95–139                       |
| <i>Lob6R</i>                     | <i>Lob640RHEX</i>           | CAACATGATGCTCATGGGACT      |                              |
| <i>Lob9F</i>                     | <i>Lob950L</i>              | GGCAATTTGGTAATCCCTCTT      | 214–278                      |
| <i>Lob9R</i>                     | <i>Lob950R6FAM</i>          | CGACATCCCATTGTCAACCT       |                              |
| <i>Lobtri1F</i>                  | <i>Lobtri1F</i>             | CCCCAAGTGATTGGGACTAA       | 310–376                      |

|                 |                       |                       |
|-----------------|-----------------------|-----------------------|
| <i>Lobtri1R</i> | <i>Lobtri1151RHEX</i> | CGACATAACGGAAAAGGAACA |
|-----------------|-----------------------|-----------------------|
